# Supplementary material for: Bovine serum albumin-capped CdS quantum dots as an inner-filter effect sensor for rapid detection and quantification of protamine and heparin
Source: Royal Society of Chemistry journal article supplement (doi:10.1039/c5ay01817j), 2015-01-01
Supplement: c5ay01817j1.pdf [file c5ay01817j1.pdf]

## Supporting Information

### **Bovine serum albumin-capped CdS quantum dots as inner-filter effect sensor for rapid detection and quantification of protamine and heparin**

Hongxia Li\* and Xiaohong Yang\*

*School of Pharmacy, Jilin University, Changchun 130021, China*

\* Corresponding author

Tel.: +86-431-85619660

E-mail address: hongxiali1106@126.com (H.X. Li)

xiaohongyang88@126.com (X.H. Yang)

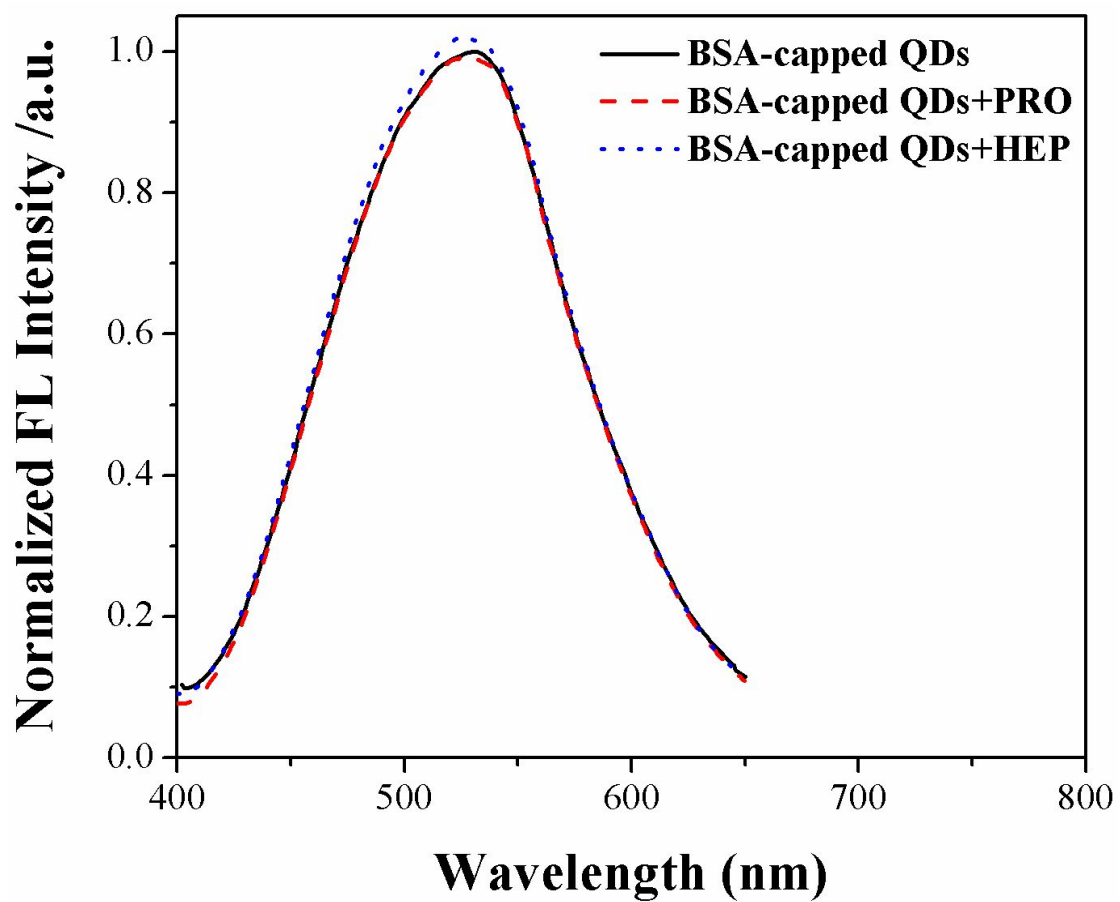

**Fig.S1** The fluorescence spectra of QDs in the presence of PRO and HEP. The final concentrations of PRO and HEP are 2000 and 2000 ng mL<sup>-1</sup>, respectively.

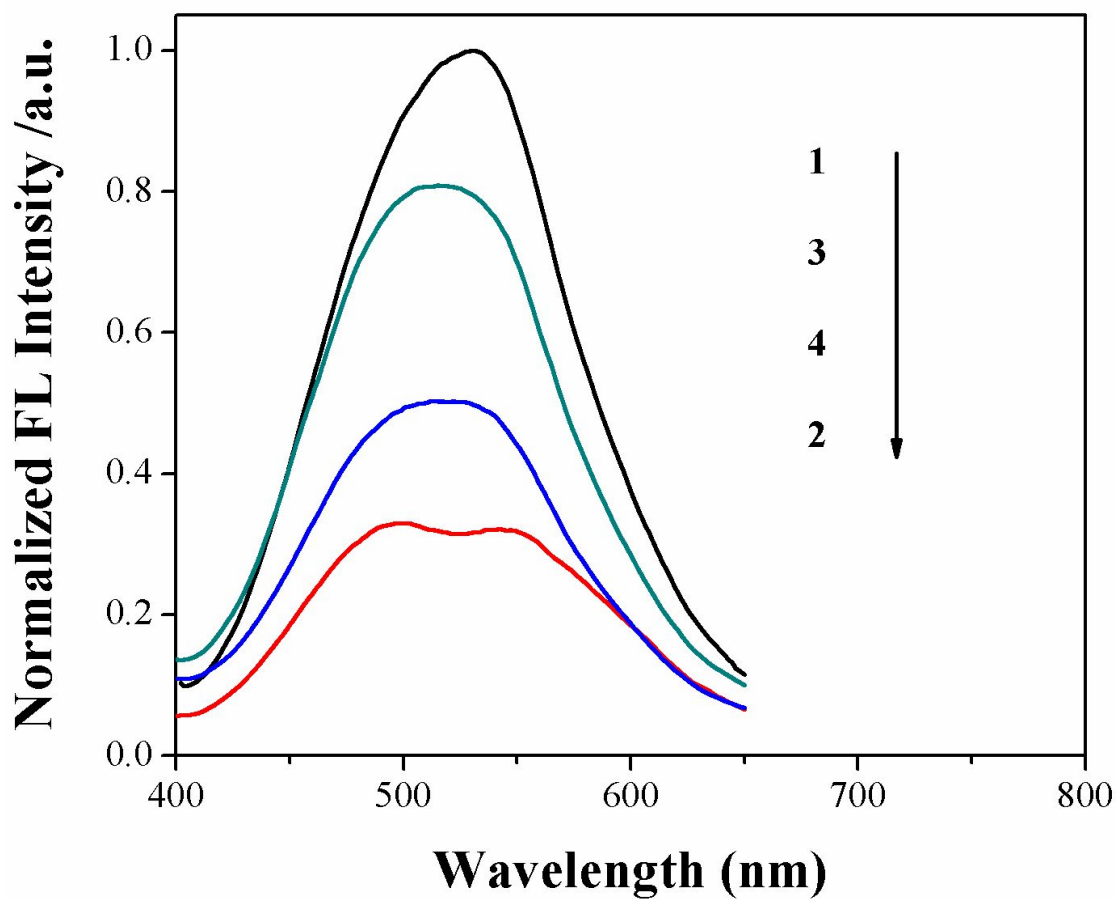

**Fig.S2** The fluorescence spectra of (1) QDs, (2) QDs and AuNPs, (3) PRO/AuNPs and QDs, and (4) HEP/PRO/AuNPs and RF-QDs. The final concentrations of PRO, HEP and AuNPs are 350 ng mL<sup>-1</sup>, 300 ng mL<sup>-1</sup> and 0.5 nmol L<sup>-1</sup>, respectively.

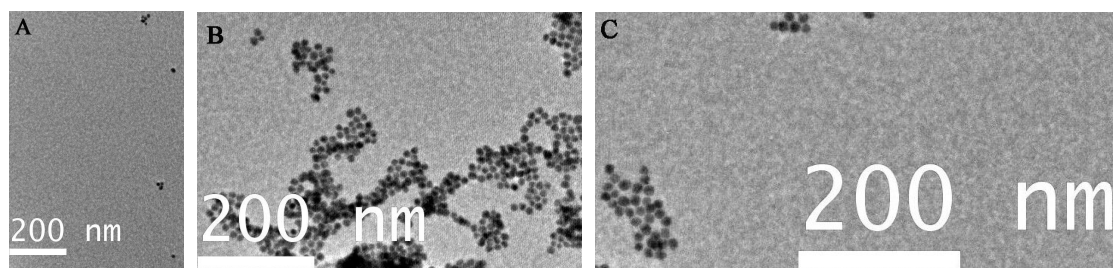

**Fig.S3** TEM images of (A) AuNPs, (B) AuNPs in the presence of PRO, (C) AuNPs in the presence of PRO and HEP.

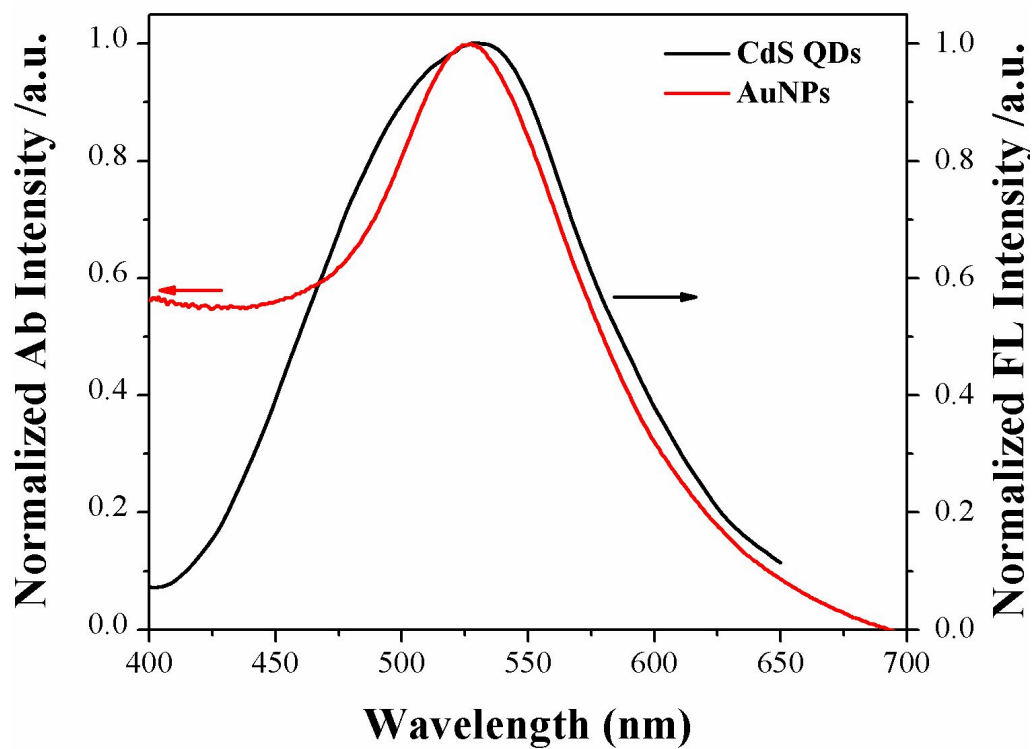

**Fig.S4** The fluorescence emission spectrum of the as-prepared CdS QDs and the absorption spectrum of AuNPs.

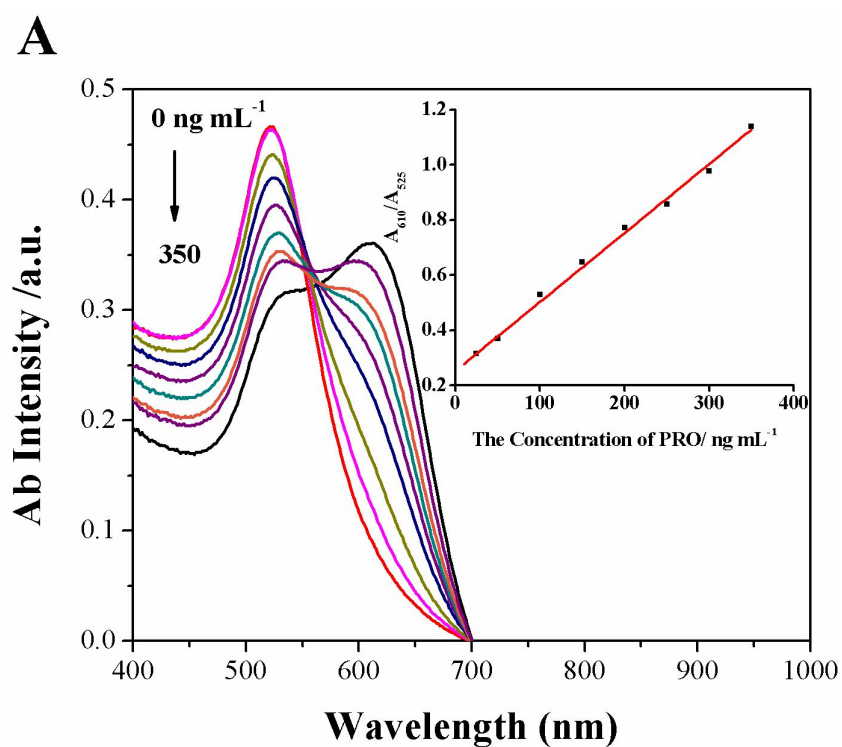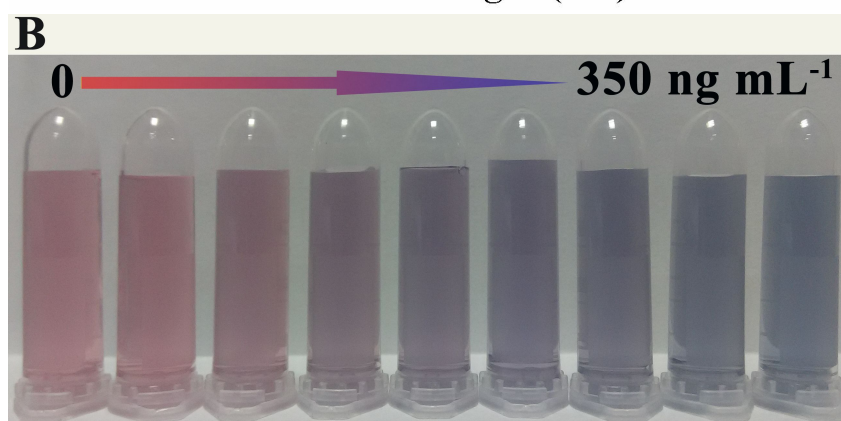

**Fig.S5** (A) The absorption spectrum of AuNPs upon the addition of PRO at different concentrations from 0 to 350 ng mL<sup>-1</sup>. Inset: the plot of absorbance intensity ratio ( $A_{610}/A_{525}$ ) of AuNPs versus the concentration of PRO.  $A_{610}$  and  $A_{525}$  were the absorbance intensity of AuNPs at 610 nm and 525 nm. (B) The photographic images of AuNPs under different concentration of PRO.

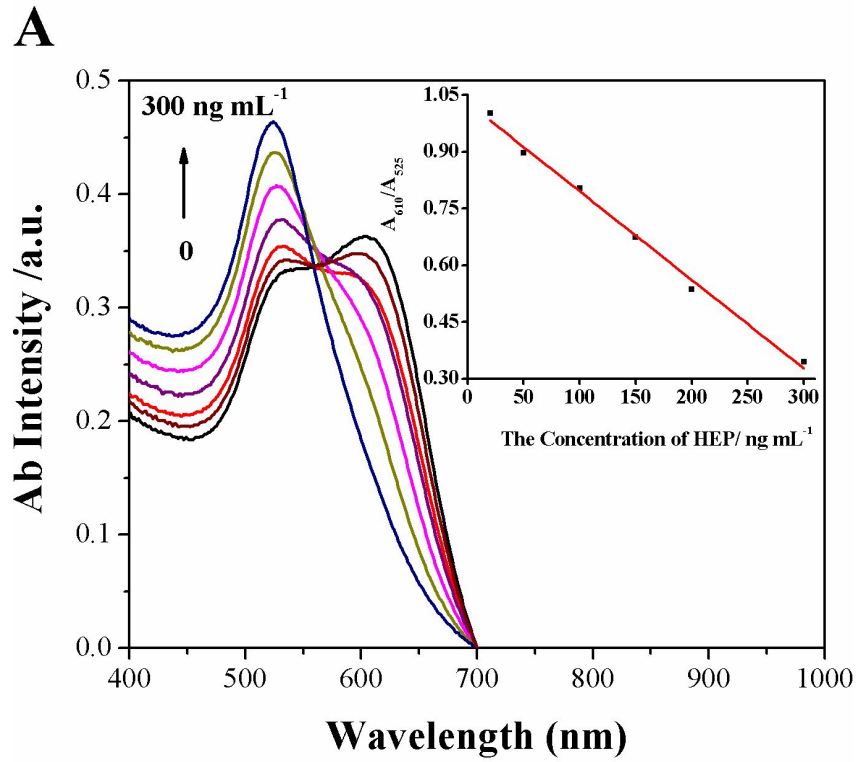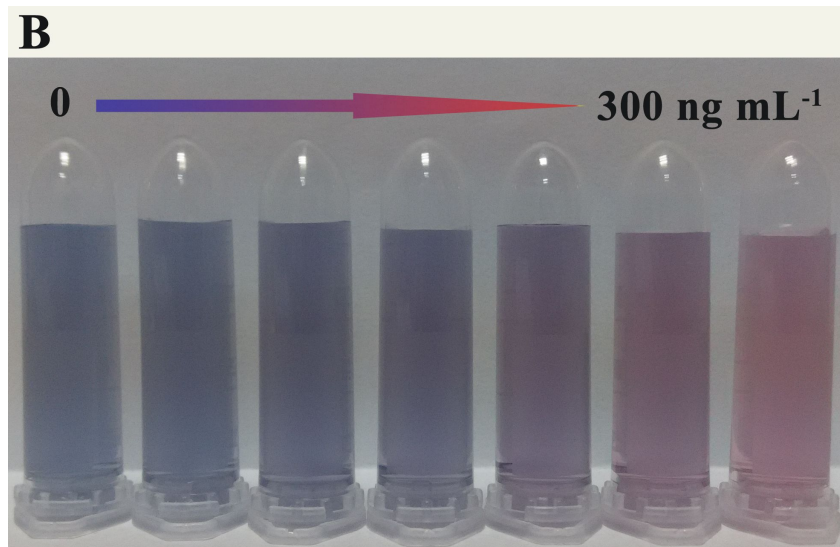

**Fig.S6** (A) The absorption spectrum of AuNPs/PRO upon the addition of HEP at different concentrations from 0 to 300  $\text{ng mL}^{-1}$ . Inset: the plot of absorbance intensity ratio ( $A_{610}/A_{525}$ ) of AuNPs versus the concentration of HEP.  $A_{610}$  and  $A_{525}$  were the absorbance intensity of AuNPs at 610 nm and 525 nm. (B) The photographic images of AuNPs/PRO under different concentration of HEP.

**Table S1** Detection of PRO in real samples.

| Sample | Original found<br>(ng mL <sup>-1</sup> ) | Spiked concentration<br>(ng mL <sup>-1</sup> ) | Found phenol<br>(ng mL <sup>-1</sup> ) | Recovery<br>(%) | RSD<br>(n=3, %) |
|--------|------------------------------------------|------------------------------------------------|----------------------------------------|-----------------|-----------------|
| 1      | 0                                        | 50                                             | 48                                     | 95              | 2.45            |
| 2      | 0                                        | 100                                            | 102                                    | 102             | 3.07            |
| 3      | 0                                        | 200                                            | 209                                    | 105             | 3.11            |



**Table S2** Detection of HEP in real samples.

| Sample | Original found<br>(ng mL <sup>-1</sup> ) | Spiked concentration<br>(ng mL <sup>-1</sup> ) | Found phenol<br>(ng mL <sup>-1</sup> ) | Recovery<br>(%) | RSD<br>(n=3, %) |
|--------|------------------------------------------|------------------------------------------------|----------------------------------------|-----------------|-----------------|
| 1      | 0                                        | 50                                             | 52                                     | 104             | 3.82            |
| 2      | 0                                        | 100                                            | 99                                     | 99              | 3.49            |
| 3      | 0                                        | 200                                            | 205                                    | 103             | 2.96            |
